# Supplementary material
Source: ML conference proceedings conference paper supplement (https://openreview.net/forum?id=WKxmP7bcFvt)

# $F_1$ and $F_2$ IPM estimates ( $k = 6$ )

IPMs

$10^{-2}$

$10^{-3}$

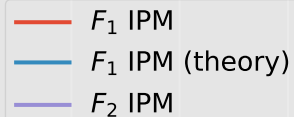

Dimension  $d$

Supplement: supplementary_material [file attachment]

$F_1$  and  $F_2$  SD estimates ( $k = 5$ )

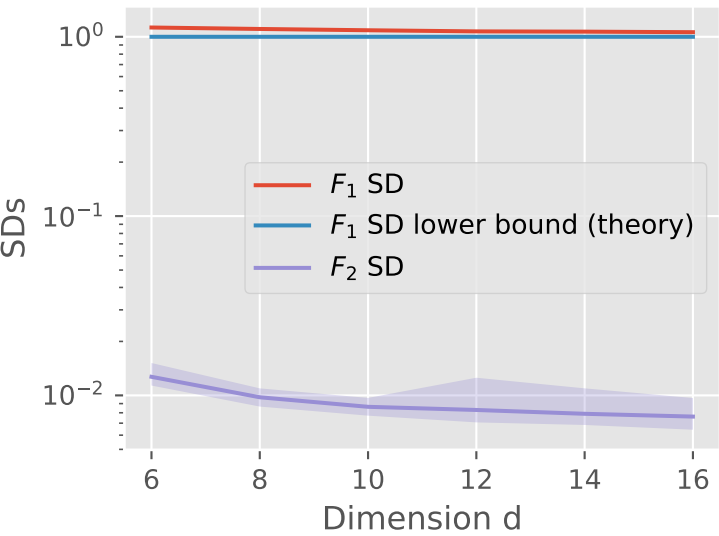

Supplement: supplementary_material [file attachment]

# Ratios $F_1$ SD / $F_2$ SD ( $k=5$ )

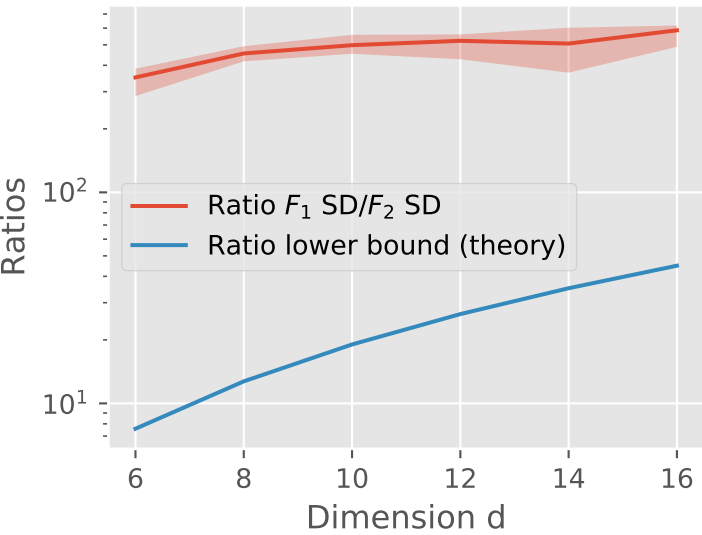

Supplement: supplementary_material [file attachment]

# $F_1$ and $F_2$ IPM estimates ( $k = 6$ )

IPMs

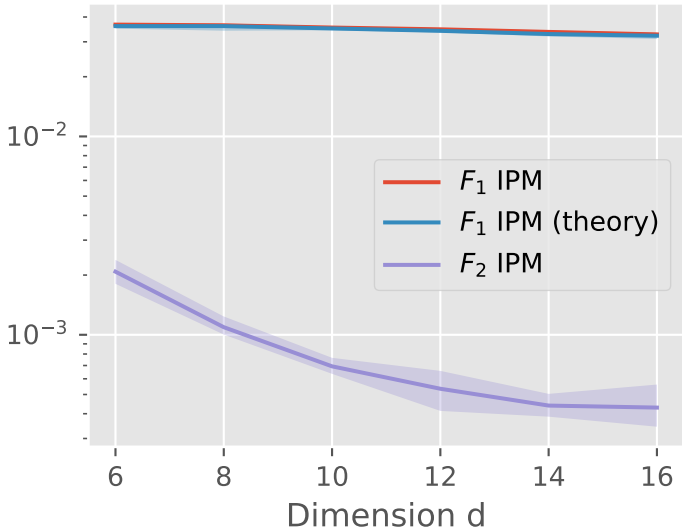

Supplement: supplementary_material [file attachment]

# $F_1$ and $F_2$ IPM estimates ( $k = 6$ )

IPMs

$10^{-2}$

$10^{-3}$

6

8

10

12

14

16

Dimension  $d$

- $F_1$  IPM
- $F_1$  IPM (theory)
- $F_2$  IPM

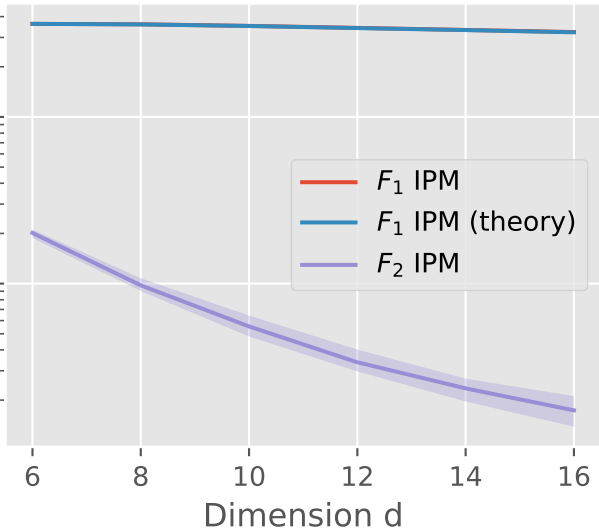

Supplement: supplementary_material [file attachment]

# Ratios $F_1$ SD / $F_2$ SD ( $k=5$ )

Ratios

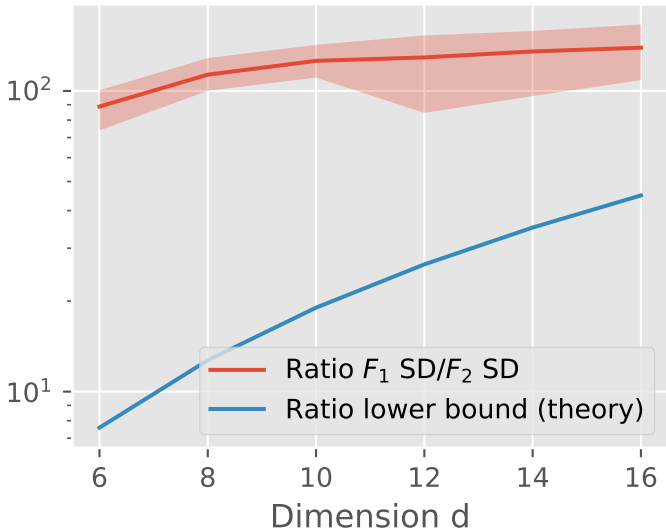

Supplement: supplementary_material [file attachment]

# Ratios between $F_1$ and $F_2$ IPM estimates ( $k = 6$ )

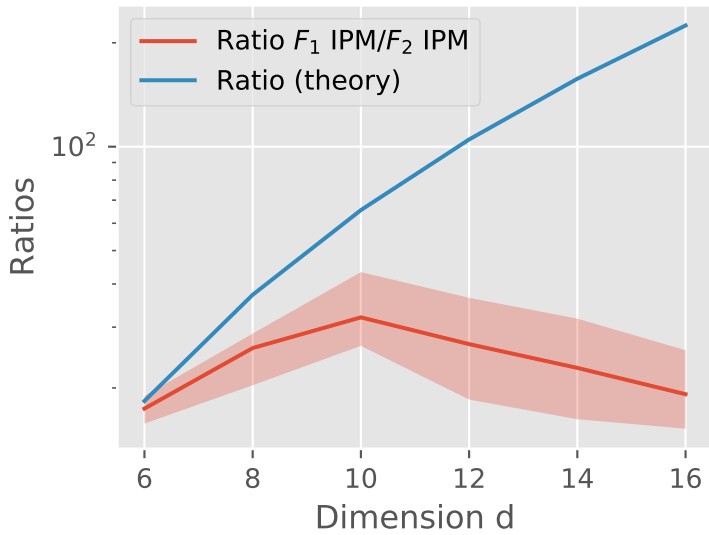

Supplement: supplementary_material [file attachment]

Metrics for same distribution samples

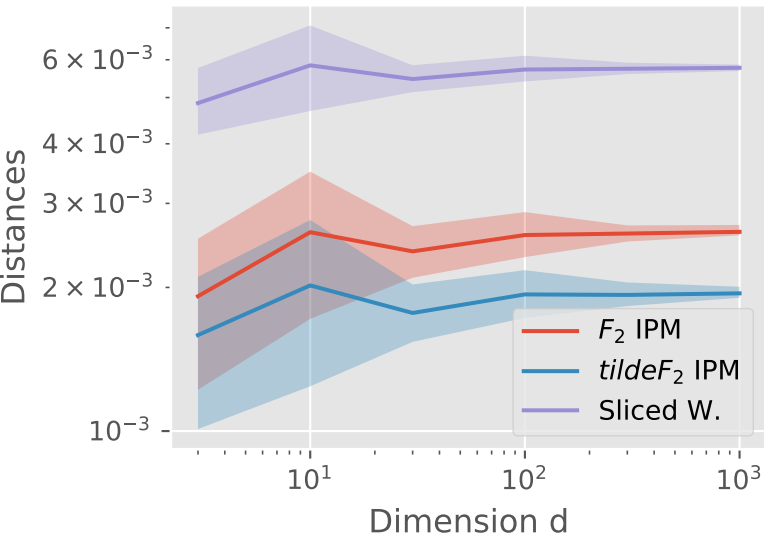

Supplement: supplementary_material [file attachment]

# Ratios between $F_1$ and $F_2$ IPM estimates ( $k = 6$ )

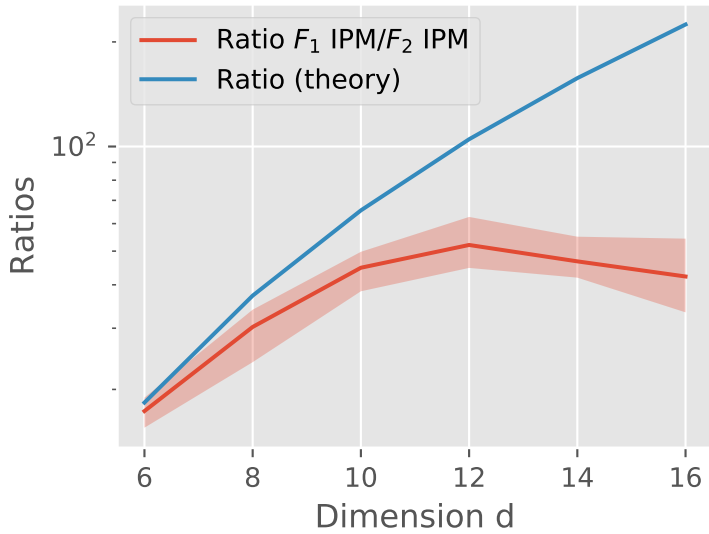

Supplement: supplementary_material [file attachment]

# Ratios $F_1$ IPM / $F_2$ IPM ( $k = 6$ )

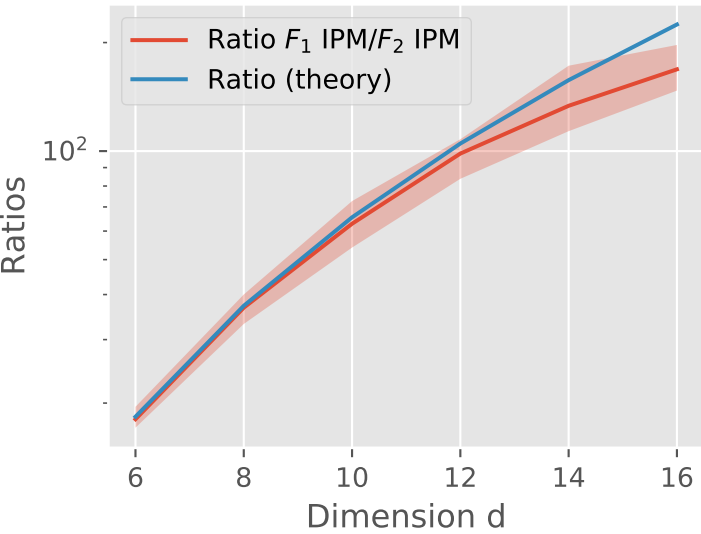

Supplement: supplementary_material [file attachment]

$F_1$  and  $F_2$  SD estimates ( $k = 5$ )

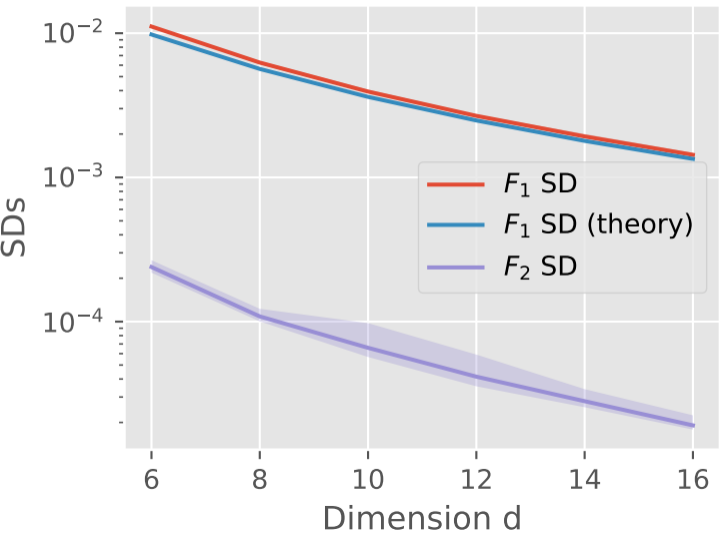

Supplement: supplementary_material [file attachment]

# $F_1$ and $F_2$ SD estimates ( $k = 5$ )

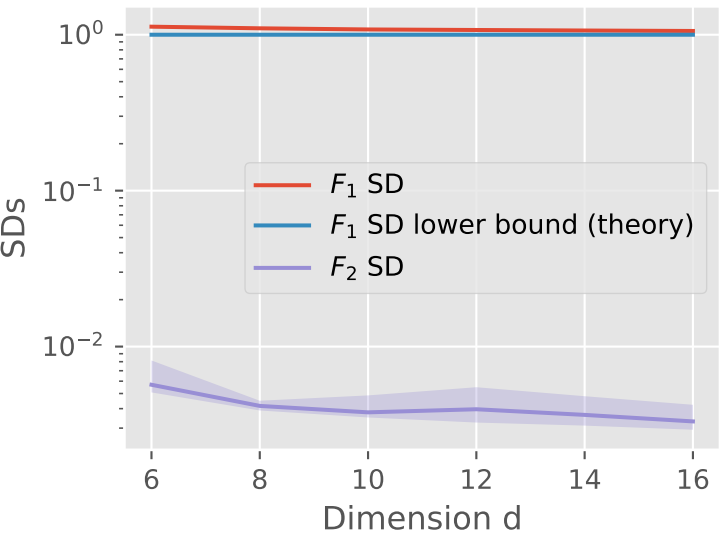

Supplement: supplementary_material [file attachment]

# Ratios between $F_1$ and $F_2$ IPM estimates ( $k = 6$ )

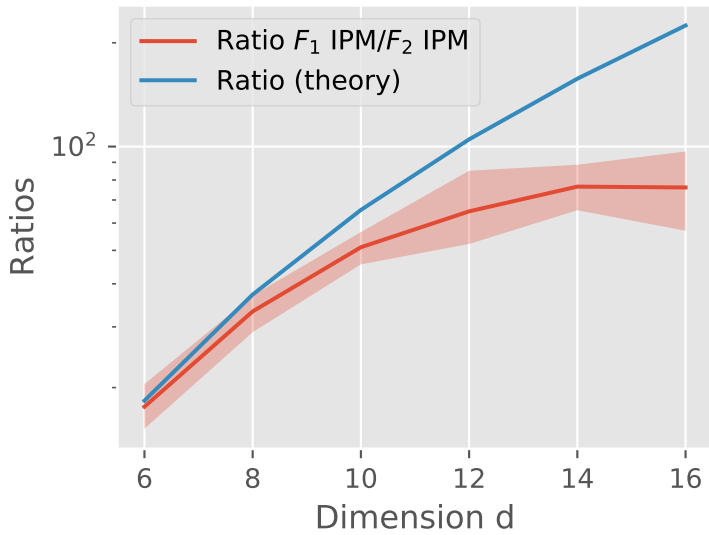

Supplement: supplementary_material [file attachment]

# $F_1$ and $F_2$ IPM estimates ( $k = 6$ )

IPMs

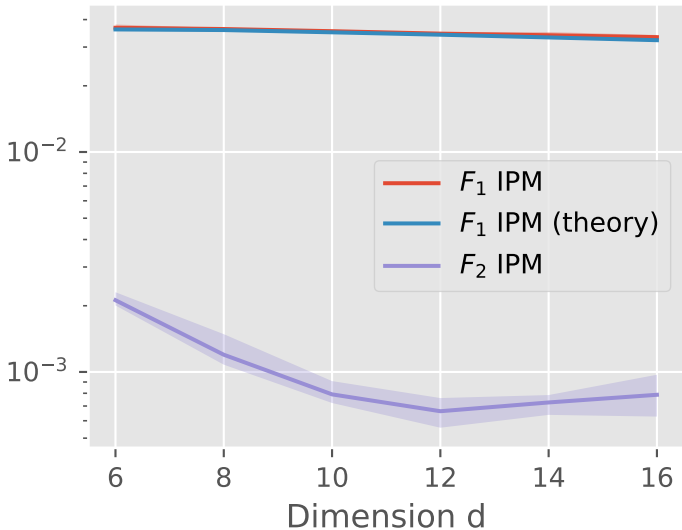

Supplement: supplementary_material [file attachment]

# Ratios $F_1$ SD / $F_2$ SD ( $k=5$ )

Ratios

$10^1$

6

8

10

12

14

16

Dimension  $d$

- Ratio  $F_1$  SD/ $F_2$  SD
- Ratio lower bound (theory)

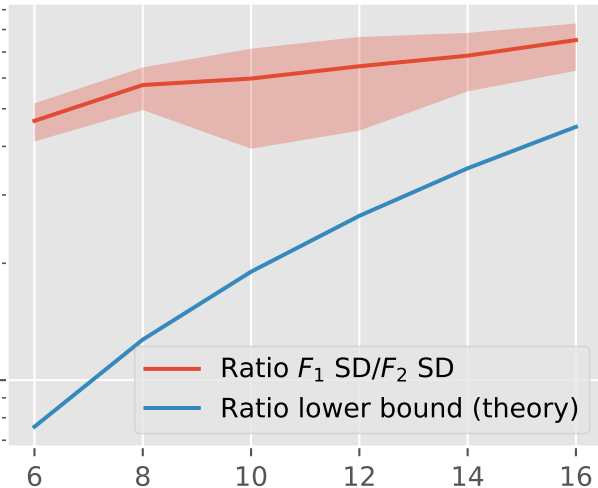

Supplement: supplementary_material [file attachment]

$F_1$  and  $F_2$  SD estimates ( $k = 5$ )

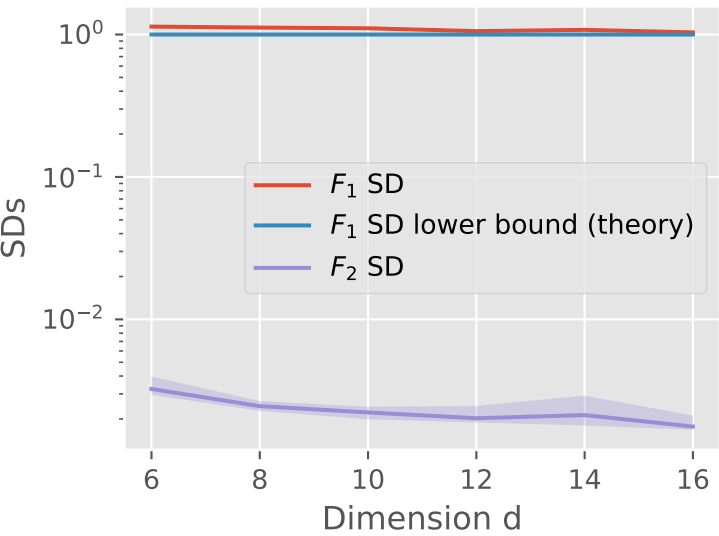

Supplement: supplementary_material [file attachment]

# Ratios $F_1$ IPM / $F_2$ IPM ( $k = 6$ )

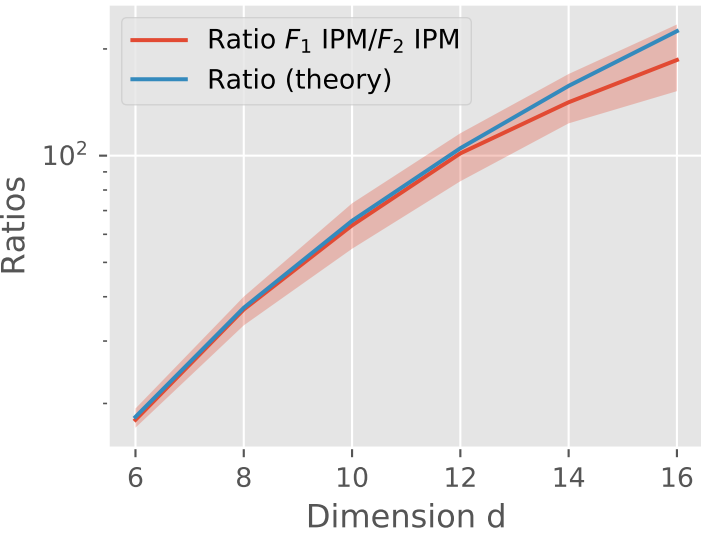

Supplement: supplementary_material [file attachment]

# $F_1$ , $F_2$ IPM vs. sliced Wasserstein

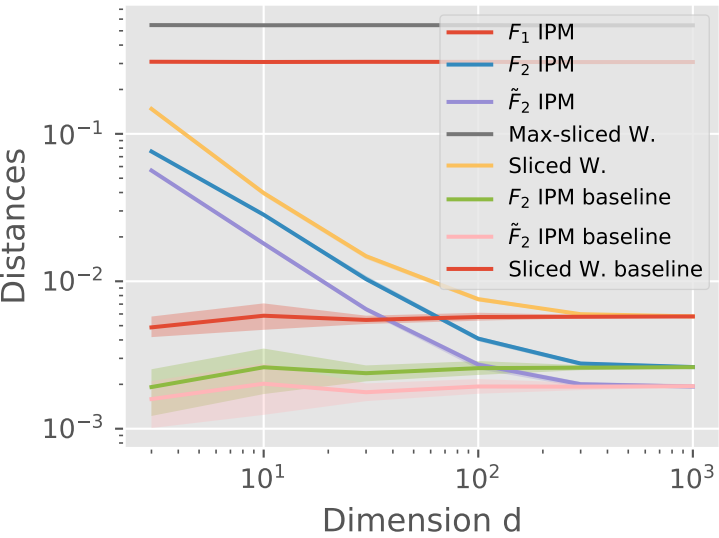

Supplement: supplementary_material [file attachment]

# $F_1$ and $F_2$ IPM estimates ( $k = 6$ )

IPMs

$10^{-2}$

$10^{-3}$

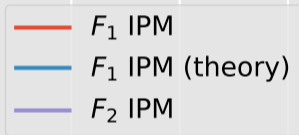

Dimension d

Supplement: supplementary_material [file attachment]

# Ratios $F_1$ SD / $F_2$ SD ( $k=5$ )

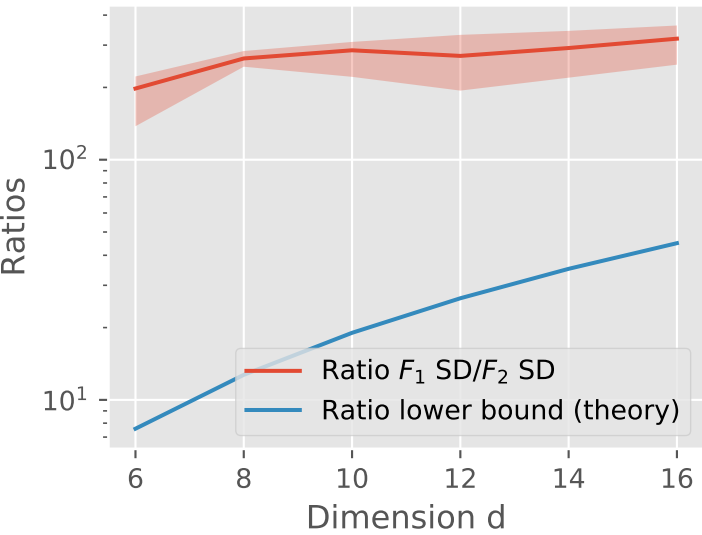

Supplement: supplementary_material [file attachment]

# Ratios $F_1$ IPM / $F_2$ IPM ( $k = 6$ )

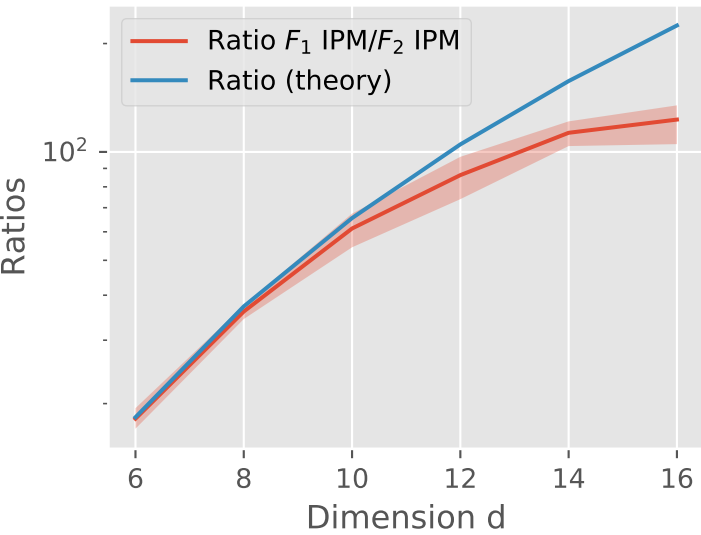

Supplement: supplementary_material [file attachment]

# $F_1$ and $F_2$ IPM estimates ( $k = 6$ )

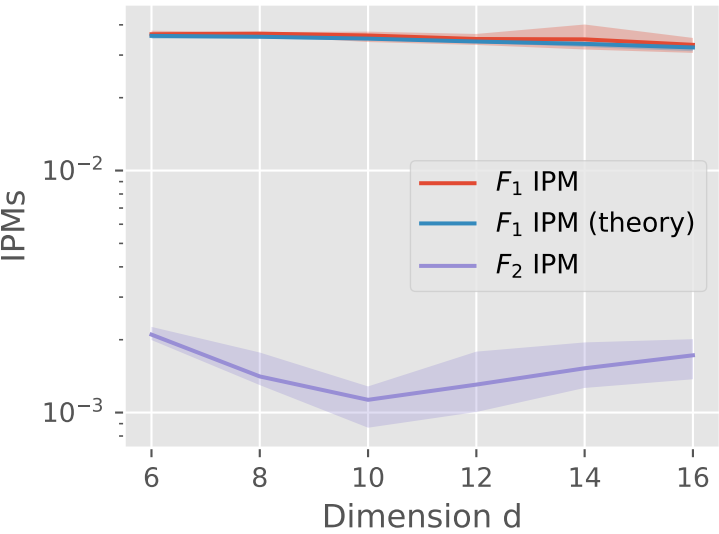

Supplement: supplementary_material [file attachment]
